# Supplementary material
Source: PubMed Central journal article supplement (PMC8372837)
Supplement: aim-olf-M210857-M21-0857_Supplement.pdf [file aim-olf-M210857-M21-0857_Supplement.pdf]

## Supplementary Material\*

Mehta HB, An H, Andersen KM, et al. Use of hydroxychloroquine, remdesivir, and dexamethasone among adults hospitalized with COVID-19 in the United States. A retrospective cohort study. *Ann Intern Med.* 17 August 2021. [Epub ahead of print]. doi:10.7326/M21-0857

|                                                                                                                                                                                                                                   |   |
|-----------------------------------------------------------------------------------------------------------------------------------------------------------------------------------------------------------------------------------|---|
| <b>Supplement Figure 1.</b> Combined use of remdesivir and dexamethasone among individuals hospitalized with COVID-19 in the National COVID Cohort Collaborative, February 1, 2020 – February 28, 2021. ....                      | 2 |
| <b>Supplement Figure 2.</b> Use of dexamethasone among individuals hospitalized with COVID-19 in the National COVID Cohort Collaborative, stratified by mechanical ventilation status, February 1, 2020 – February 28, 2021. .... | 3 |
| <b>Supplement Figure 3.</b> Dexamethasone and other corticosteroid use among mechanically ventilated patients following the release of the RECOVERY trial results, July 1, 2020 – February 28, 2021. ....                         | 4 |
| <b>Supplement Figure 4.</b> Variation in dexamethasone use across health centers in the National COVID Cohort Collaborative over time, stratified by mechanical ventilation status. ....                                          | 5 |
| <b>Supplement Figure 5.</b> Time to first dexamethasone use and duration of dexamethasone use among hospitalized adults with COVID-19 in the U.S. from July 1, 2020 – February 28, 2021. ....                                     | 6 |
| <b>Supplement Figure 6.</b> Variation in time to dexamethasone initiation and duration of dexamethasone use stratified by race/ethnicity, February 1, 2020 – February 28, 2021. ....                                              | 7 |
| <b>Supplement Figure 7.</b> Variation in time to dexamethasone initiation and duration of dexamethasone use stratified by centers, February 1, 2020 – February 28, 2021. ....                                                     | 8 |
| <b>Supplement Table.</b> List of ICD-10-CM diagnosis and SNOMED codes. ....                                                                                                                                                       | 9 |

\* This supplementary material was provided by the authors to give readers further details on their article. The material was reviewed but not copyedited.

**Supplement Figure 1.** Combined use of remdesivir and dexamethasone among individuals hospitalized with COVID-19 in the National COVID Cohort Collaborative, February 1, 2020 – February 28, 2021.

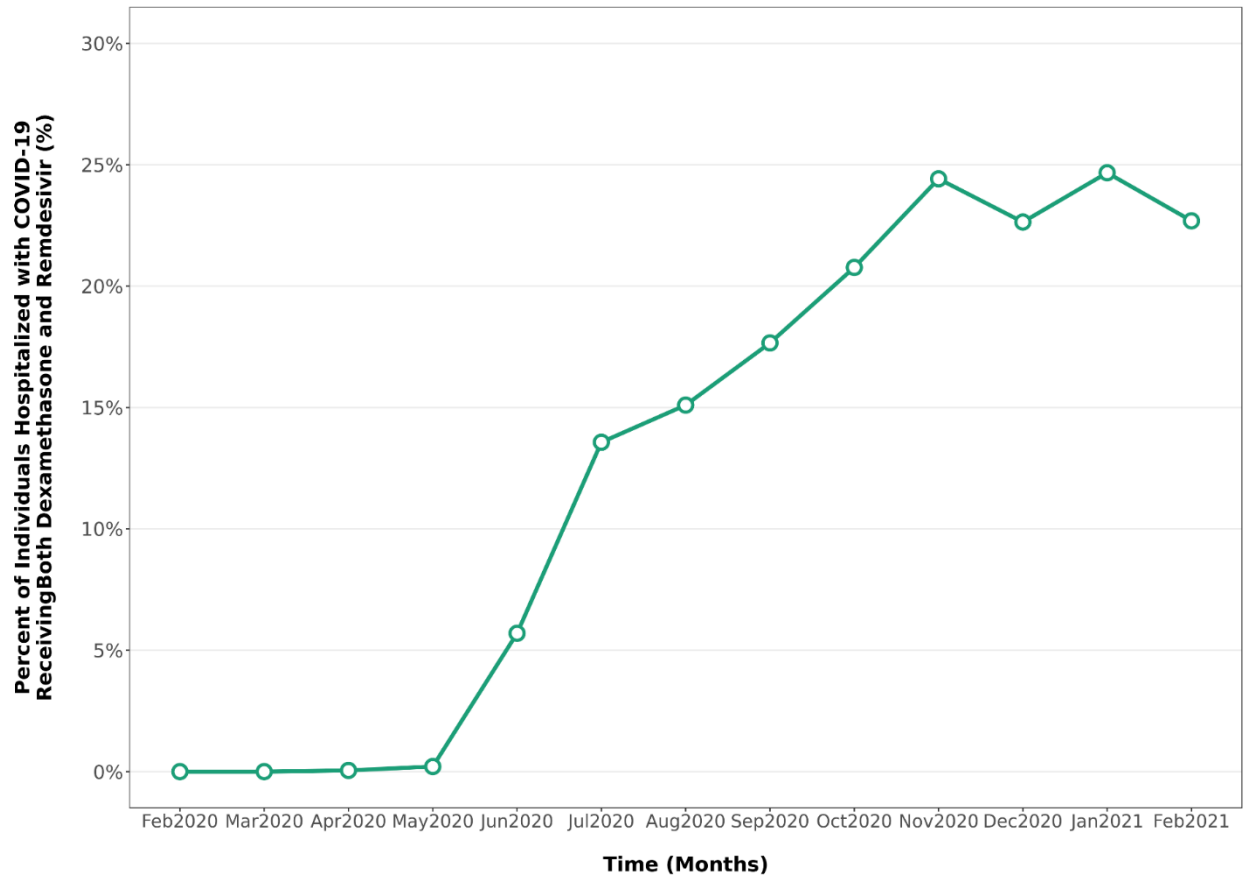

**Supplement Figure 2.** Use of dexamethasone among individuals hospitalized with COVID-19 in the National COVID Cohort Collaborative, stratified by mechanical ventilation status, February 1, 2020 – February 28, 2021.

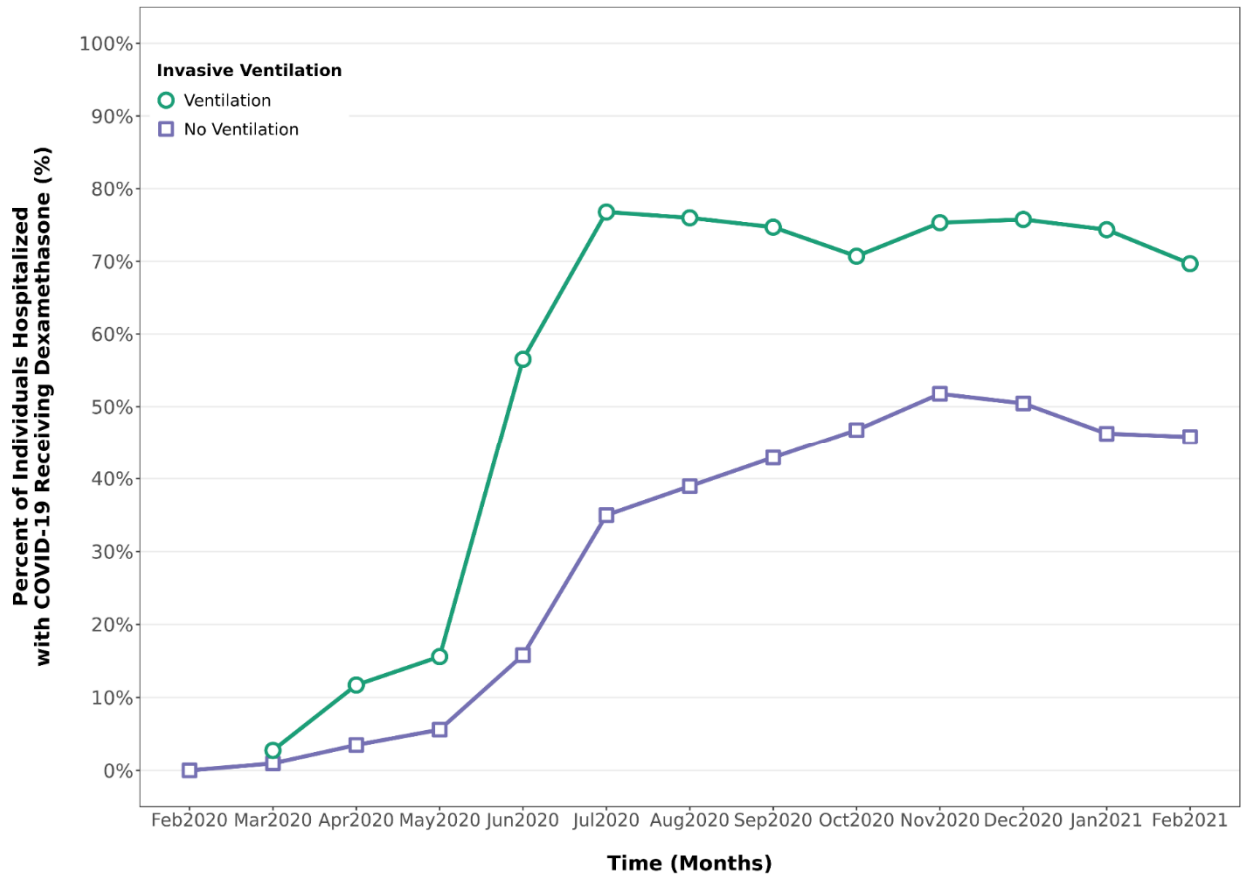

**Supplement Figure 3.** Dexamethasone and other corticosteroid use among mechanically ventilated patients following the release of the RECOVERY trial results, July 1, 2020 – February 28, 2021.

A) Among all patients

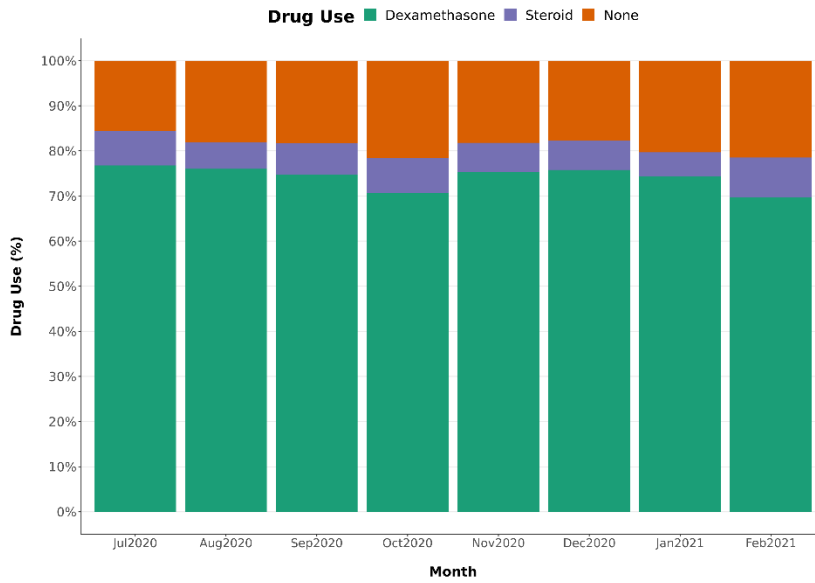

B) Among patients who remained hospitalized for 2 days or more

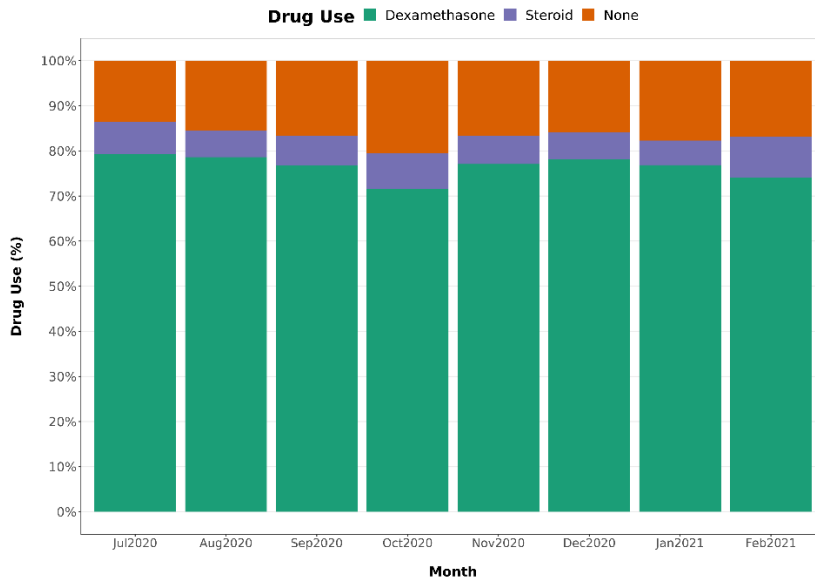

**Supplement Figure 4.** Variation in dexamethasone use across health centers in the National COVID Cohort Collaborative over time, stratified by mechanical ventilation status.

A) Among all centers from February 2020 to February 2021

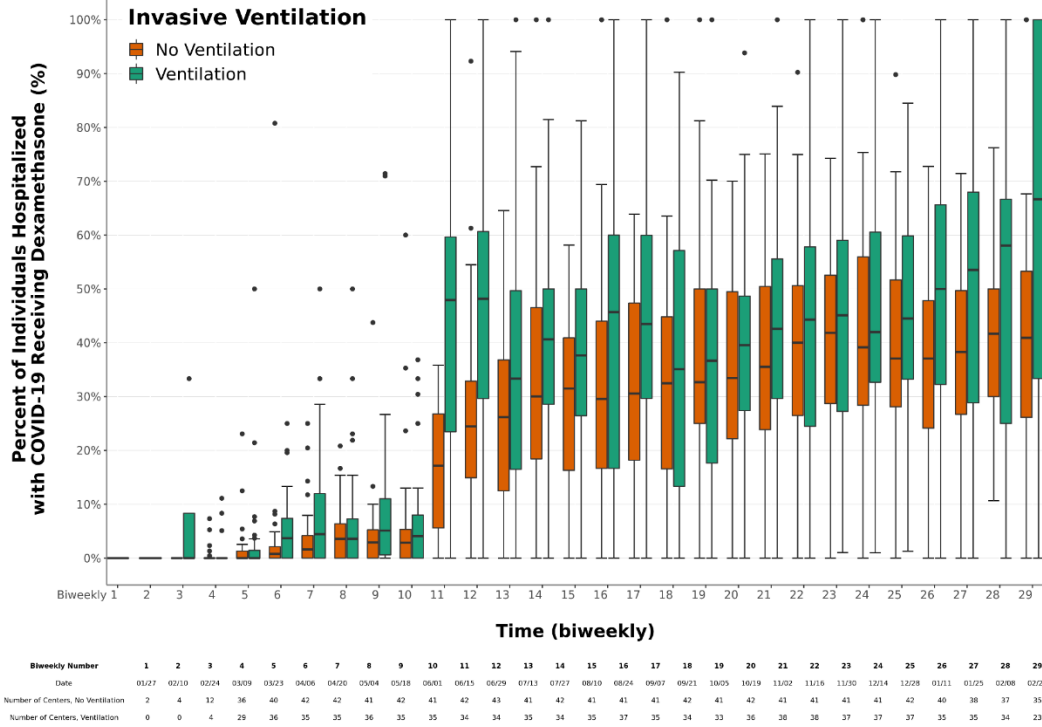

B) Among centers with data from July 2020 to February 2021

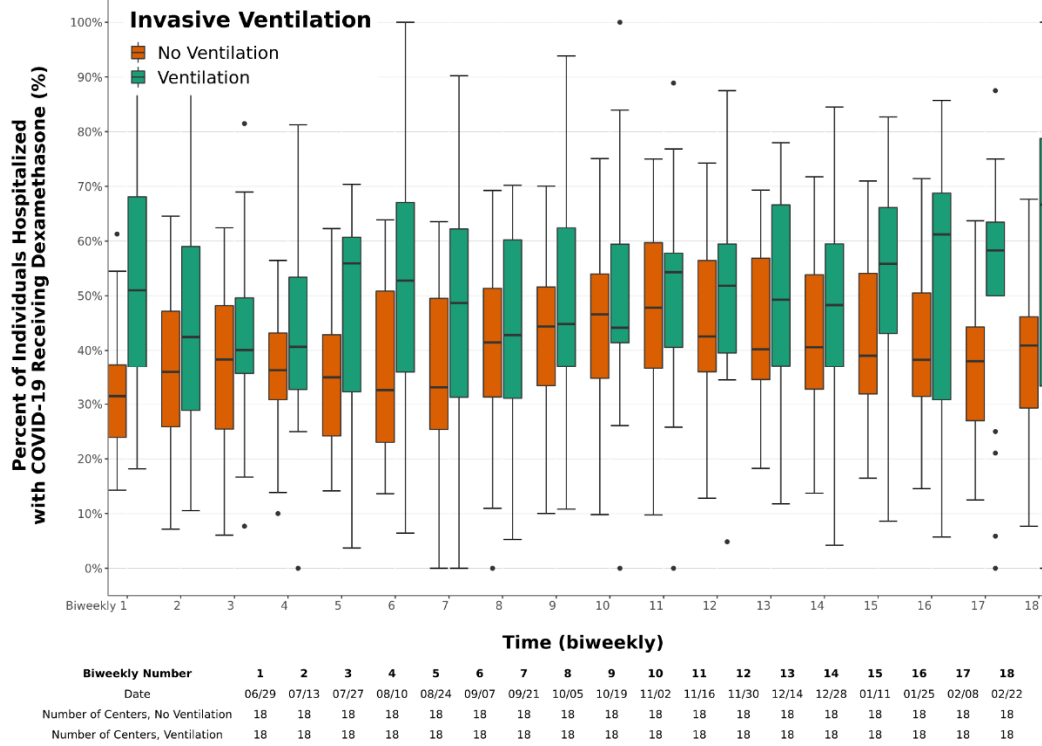

**Supplement Figure 5.** Time to first dexamethasone use and duration of dexamethasone use among hospitalized adults with COVID-19 in the U.S. from July 1, 2020 – February 28, 2021.

A) Time to first dexamethasone use

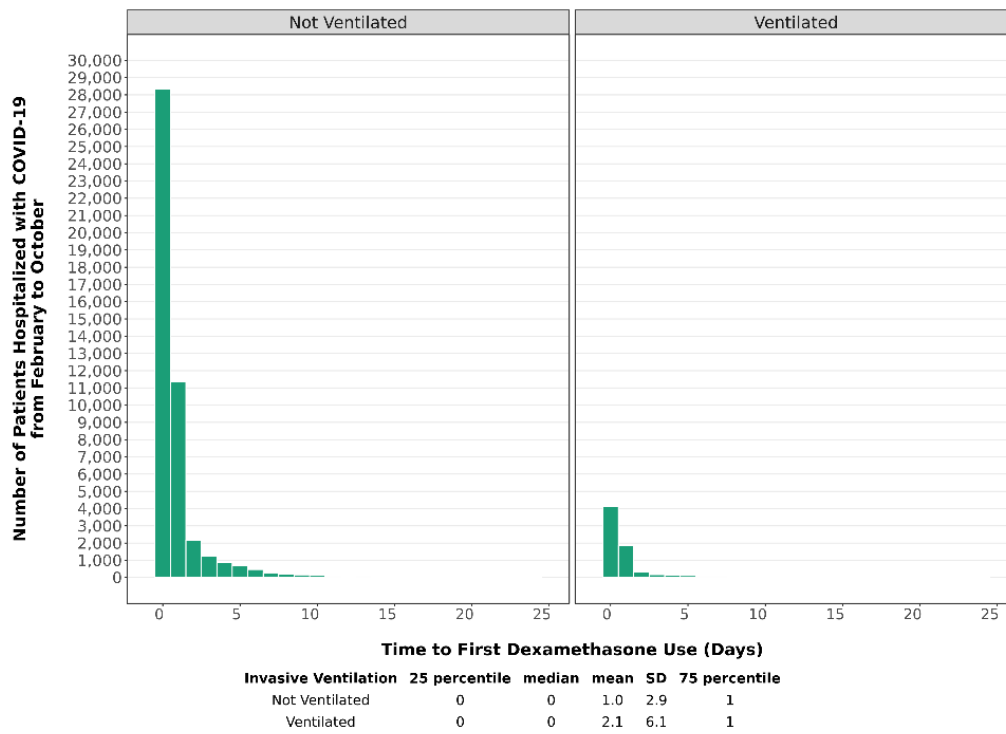

B) Duration of dexamethasone use

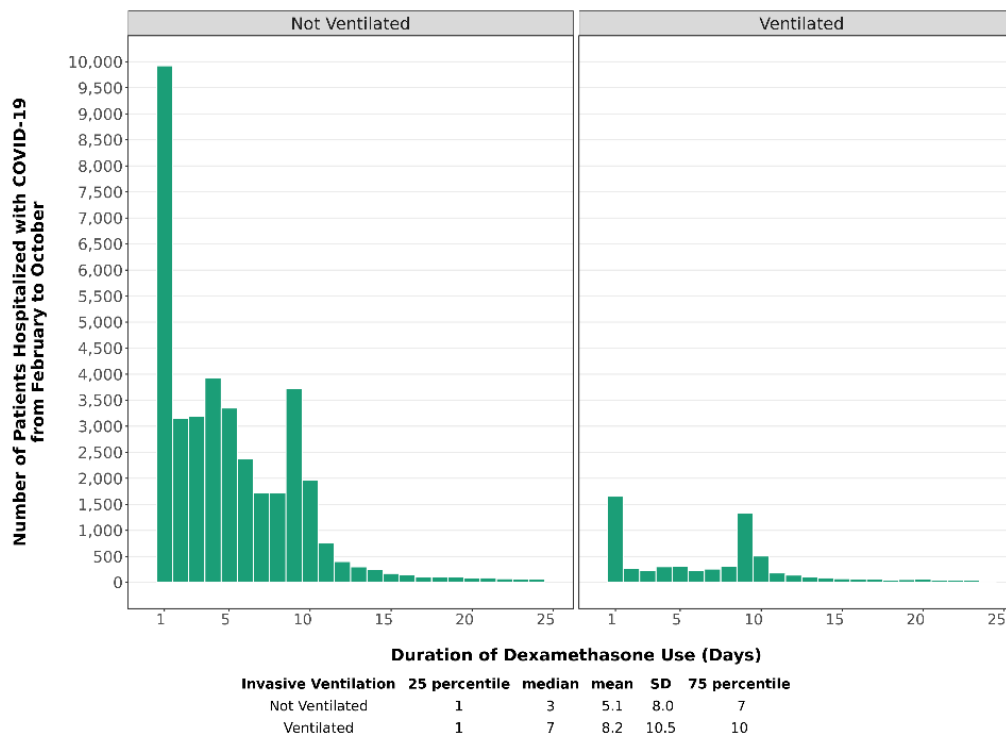

**Supplement Figure 6.** Variation in time to dexamethasone initiation and duration of dexamethasone use stratified by race/ethnicity, February 1, 2020 – February 28, 2021.

**A) Dexamethasone initiation**

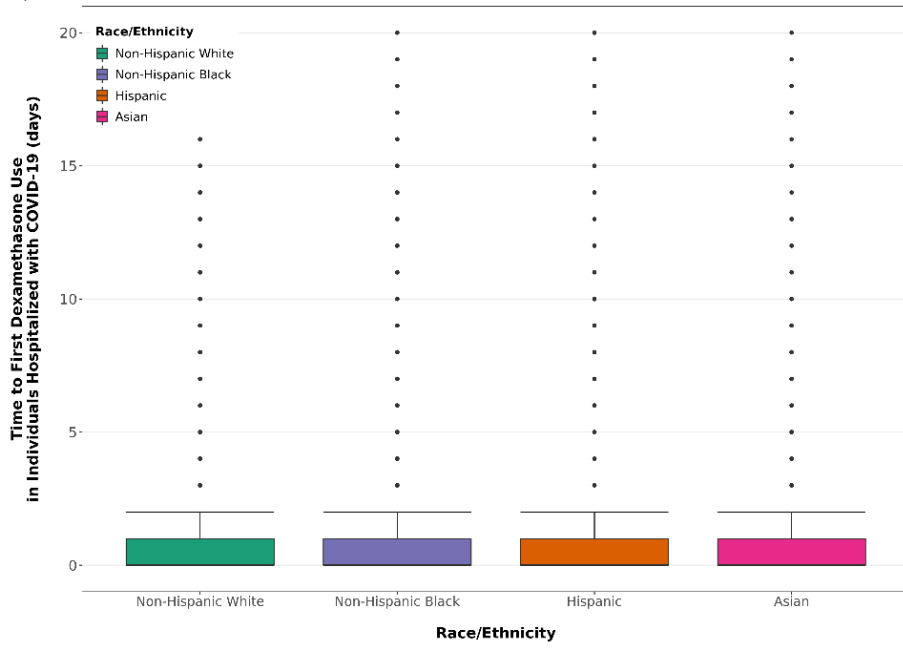

**B) Dexamethasone duration**

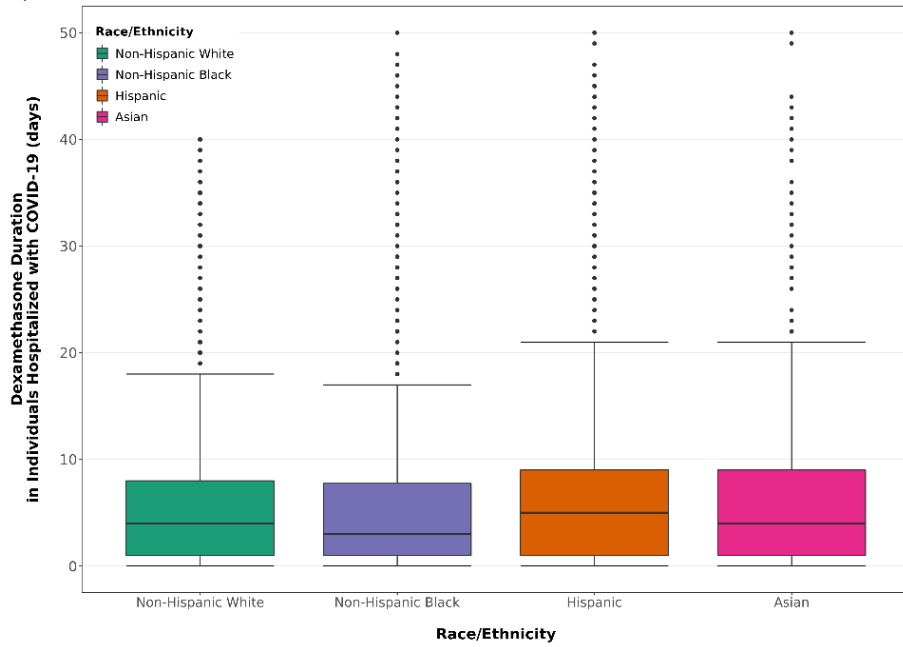

**Supplement Figure 7.** Variation in time to dexamethasone initiation and duration of dexamethasone use stratified by centers, February 1, 2020 – February 28, 2021.

**A) Dexamethasone initiation**

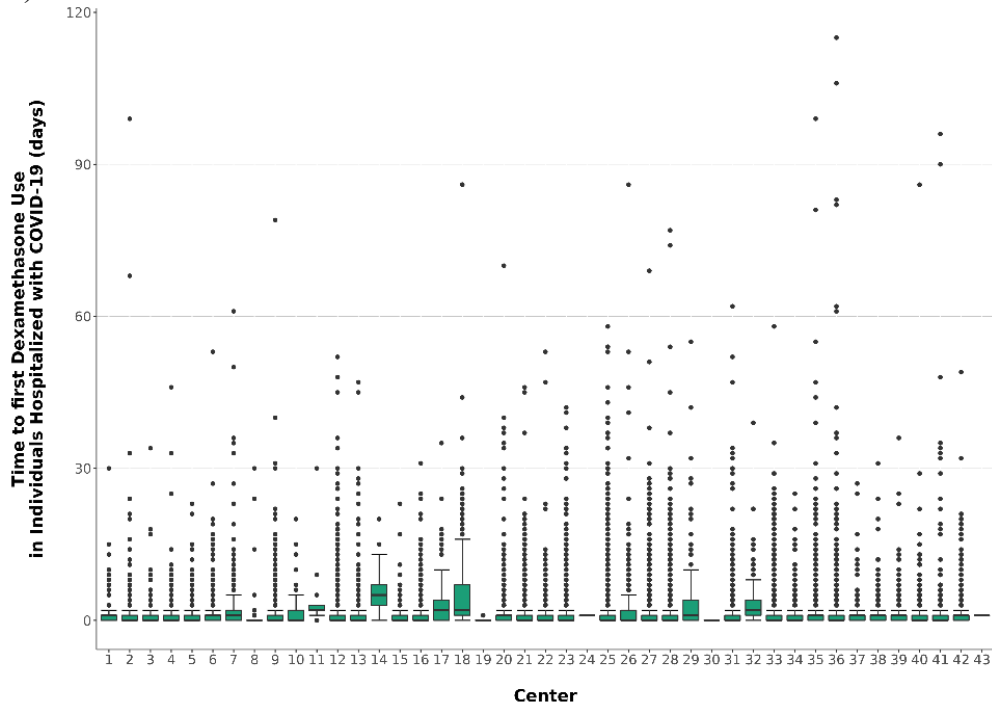

**B) Dexamethasone duration**

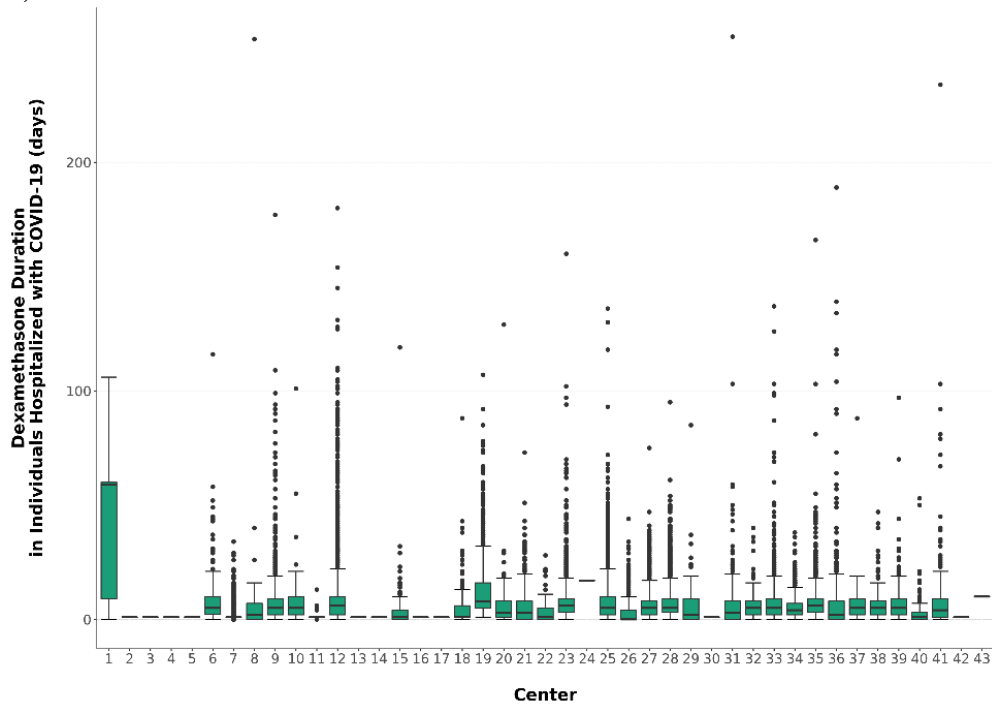



**Supplement Table.** List of ICD-10-CM diagnosis and SNOMED codes.

| <b>ICD-10-CM Code</b> | <b>Diagnosis Name</b>                                                      | <b>Confidence Level</b>                                         |
|-----------------------|----------------------------------------------------------------------------|-----------------------------------------------------------------|
| B97.21                | SARS-associated coronavirus as the cause of diseases classified elsewhere  | Strong positive prior to 4/1/2020; weak positive after 4/1/2020 |
| B97.29                | Other coronavirus as the cause of diseases classified elsewhere            | Strong positive prior to 4/1/2020; weak positive after 4/1/2020 |
| U07.1                 | 2019-nCoV acute respiratory disease                                        | Strong positive                                                 |
| Z11.59                | Screening for viral diseases                                               | Asymptomatic                                                    |
| Z20.828               | Contact with and (suspected) exposure to other viral communicable diseases | Weak positive                                                   |
| B34.2                 | Coronavirus infection, unspecified                                         | Weak positive                                                   |
| R50.X                 | Fever                                                                      | Weak positive                                                   |
| R05.X                 | Cough                                                                      | Weak positive                                                   |
| R06.0X                | Dyspnea                                                                    | Weak positive                                                   |
| J12.X; J18.X          | Pneumonia                                                                  | Weak positive                                                   |
| J20.X; J40.X          | Bronchitis (acute or nonspecified)                                         | Weak positive                                                   |
| J21.X                 | Acute bronchiolitis                                                        | Weak positive                                                   |
| J96.X                 | Respiratory failure                                                        | Weak positive                                                   |
| J22.X                 | Unspecified acute lower respiratory infection                              | Weak positive                                                   |
| J06.9                 | Acute upper respiratory infection, unspecified                             | Weak positive                                                   |
| J98.8                 | Other specified respiratory disorders                                      | Weak positive                                                   |
| J80.X                 | Acute respiratory distress syndrome                                        | Weak positive                                                   |
| R43.0                 | Anosmia                                                                    | Weak positive                                                   |
| R43.2                 | Parageusia                                                                 | Weak positive                                                   |
| R07.1                 | Chest pain on breathing                                                    | Weak positive                                                   |
| R68.83                | Chills (without fever)                                                     | Weak positive                                                   |
| <b>SNOMED Code</b>    | <b>Name</b>                                                                | <b>Confidence Level</b>                                         |
| 840539006             | Disease caused by 2019 novel coronavirus (disorder)                        | Strong positive                                                 |
| 840544004             | Suspected disease caused by 2019 novel coronavirus (situation)             | Strong positive                                                 |
| 840546002             | Exposure to severe acute respiratory syndrome coronavirus 2 (event)        | Weak positive                                                   |
| 103001002             | Feeling feverish (finding)                                                 | Weak positive                                                   |
| 11833005              | Dry cough (finding)                                                        | Weak positive                                                   |
| 267036007             | Dyspnea (finding)                                                          | Weak positive                                                   |
| 28743005              | Productive cough (finding)                                                 | Weak positive                                                   |

|           |                                          |               |
|-----------|------------------------------------------|---------------|
| 36955009  | Loss of taste (finding)                  | Weak positive |
| 426000000 | Fever greater than 100.4 Fahrenheit      | Weak positive |
| 44169009  | Loss of sense of smell (finding)         | Weak positive |
| 49727002  | Cough (finding)                          | Weak positive |
| 135883003 | Cough with fever (finding)               | Weak positive |
| 161855003 | Complaining of shivering (finding)       | Weak positive |
| 161939006 | Breathless - moderate exertion (finding) | Weak positive |
| 161940008 | Breathless - mild exertion (finding)     | Weak positive |
| 161941007 | Dyspnea at rest (finding)                | Weak positive |
| 2237002   | Pleuritic pain (finding)                 | Weak positive |
| 23141003  | Gasping for breath (finding)             | Weak positive |
| 247410004 | Painful cough (finding)                  | Weak positive |
| 274640006 | Fever with chills (finding)              | Weak positive |
| 274664007 | Chest pain on breathing (finding)        | Weak positive |
| 284523002 | Persistent cough (finding)               | Weak positive |
| 386661006 | Fever (finding)                          | Weak positive |
| 409702008 | Hyperpyrexia (finding)                   | Weak positive |
| 426976009 | Pain provoked by breathing (finding)     | Weak positive |
| 43724002  | Chill (finding)                          | Weak positive |
| 60845006  | Dyspnea on exertion (finding)            | Weak positive |
| 75483001  | Breathing painful (finding)              | Weak positive |

**ICD-10-CM** International Classification of Diseases, Tenth Revision, Clinical Modification; **SNOMED** Systematized Nomenclature of Medicine.

Note: Using the N3C definition, we defined individuals as COVID-positive if they had at least one positive test result for any COVID-19 diagnostic or antibody test, one or more of the “strong positive” diagnosis codes, or two or more of the “weak positive” diagnosis codes from the International Classification of Diseases, Tenth Revision, Clinical Modification (ICD-10-CM) or Systematized Nomenclature of Medicine (SNOMED) codes (**eTable 1**).
